# Supplementary material
Source: publisher site journal article supplement (https://neobiota.pensoft.net/article/34941/download/suppl/31/)
Supplement: Supplementary file 1

**Supplementary material**

**S1.** Working to support the formulation of the critical removal threshold (– the number of days required to reduce a population to less than two individuals.

Initial population size:

Population removal each night:

Number remaining at timestep t:

Removals each night can be calculated as:

As we want to know time, at which :
